# Supplementary material for: Health Professional Perspectives on Integrating Substance Use Services into Pediatric Hospitals for Adolescents with Chronic Medical Conditions
Source: Research Square preprint supplement (doi:10.21203/rs.3.rs-7032546/v1), 2025-10-17
Supplement: Supplementary file 1 [file 1cafc0796a62e0e6780357b7.docx]

**CFIR Healthcare Professionals Codebook**

| 1. **Characteristics of Individuals** |  |
| --- | --- |
| 1. Knowledge & Beliefs about alcohol and other drugs (AOD) | Definition: Providers’ attitudes toward and value placed on AOD as an issue for their patients.    Inclusion Criteria:   1. Statements related to understanding the risk factors of adolescent AOD use. 2. Discussion of how substance use impacts their patient population. 3. Statements related to alcohol and other drug use among patients with a chronic medical condition (CMC).     Exclusion Criteria:   1. Statements related to familiarity with evidence about the SBIRT and code to [Evidence Strength & Quality](http://cfirwiki.net/wiki/index.php?title=Evidence_Strength_%26_Quality).     Example Interview Question: Do you think that substance use among adolescents in your service area is an important health issue?    Example Response: “I think the world is ever-changing and there’s a lot of contributing factors as to why substance abuse is more prevalent now than it has been in the past, but definitely something that we need to learn and grow about.” |
| 1. Knowledge & Beliefs about SBIRT | Definition: Providers’ attitudes toward and value placed on SBIRT, as well as familiarity with facts, truths, and principles related to SBIRT.    Inclusion Criteria:  1. Statements related to prior knowledge about SBIRT.  2. Statements regarding SBIRT pros/benefits and cons/concerns.  3. Feelings about appropriateness of using SBIRT in their specific setting.    Exclusion Criteria:   1. Statements related to familiarity with evidence about the SBIRT and code to [Evidence Strength & Quality](http://cfirwiki.net/wiki/index.php?title=Evidence_Strength_%26_Quality).     Example Interview Question:  How familiar were you with SBIRT-A before this conversation?    Example Response:  I had just heard about it due to one interaction that we’ve had. But otherwise in my training, otherwise I have not heard of it. |
| 1. Self-efficacy | Definition: Individual confidence in their colleagues and their own capabilities to execute courses of action to achieve and implement SBIRT goals.    Inclusion Criteria:   1. Statements describing confidence or lack of confidence in personal ability to use SBIRT and achieve its goals. 2. Statements describing confidence or lack of confidence in colleagues' ability to use SBIRT and achieve its goals.     Exclusion Criteria:   1. Statements describing previous experiences in using other interventions (e.g. not SBIRT). 2. Statements regarding need for SBIRT.     Example Interview Question: How confident are you that you will be able to successfully implement and use SBIRT?    Example Response: “I think for me and my team we’ve been able to collaborate internally and externally about implementing and standardized screening for social influences of healthcare at The Hospital.” |
| 1. **Process** |  |
| 1. Opinion Leaders & Key Stakeholders | Definition: Individuals or groups at The Hospital who have formal or informal influence on their colleagues’ attitudes and beliefs about implementing SBIRT. Individuals or groups from The Hospital that are directly impacted by SBIRT (e.g., staff responsible for making referrals to a new program or using a new work process/workflow).  This includes champions defined as: “Individuals who dedicate themselves to supporting, marketing, and ‘driving through’ an [implementation]”, (e.g., overcoming indifference or resistance that an AOD use intervention like SBIRT may provoke in an organization). Those who go above and beyond what is expected and champion using SBIRT at The Hospital.  Inclusion Criteria:   1. Include statements related to engagement strategies and outcomes, e.g., how the opinion leader became engaged with the intervention and what their role is in implementation. Note: Although both strategies and outcomes are coded here, the outcome of efforts to engage staff determines the rating, i.e., if there are repeated attempts to engage an opinion leader that are unsuccessful, or if the opinion leader leaves the organization and this role is vacant, the construct receives a negative rating. 2. In addition, you may also want to code the “quality” of the opinion leader here – their capabilities, motivation, and skills, i.e., how good they are at their job, and this data affects the rating as well. 3. Include statements related to engagement strategies and outcomes, e.g., how hospital staff became engaged with the intervention and what their role is in implementation, their influence on the intervention. Note: Although both strategies and outcomes are coded here, the outcome of efforts to engage staff determines the rating, i.e., if there are repeated attempts to engage hospital staff that are unsuccessful, the construct receives a negative rating. 4. Mention of champions, both formal and informal, administrative staff, clinical staff, patients, or other advocates.     Exclusion Criteria:   1. Exclude statements that do not describe the role/ influence that the opinion leader may contribute to the intervention's implementation. 2. Exclude statements related to implementation leaders' and users' access to knowledge and information regarding using the program, i.e., training on the mechanics of the program, and code to [Access to Knowledge & Information](http://cfirwiki.net/wiki/index.php?title=Access_to_Knowledge_%26_Information). 3. Exclude statements about general networking, communication, and relationships in the organization, such as descriptions of meetings, email groups, or other methods of keeping people connected and informed, and statements related to team formation, quality, and functioning, and code to [Networks & Communications](http://cfirwiki.net/wiki/index.php?title=Networks_%26_Communications). 4. Exclude or double code statements regarding leadership engagement to Leadership Engagement if a champion is also an organizational leader, e.g., if a director of primary care takes the lead in implementing a new treatment guideline.     Example Interview Question: Who are the key influential individuals to get on board with this implementation?    Example Response: Oh, boy. That’s a big question. I would say you definitely need nursing informatics – nursing. You have to have likely in the ambulatory space all the ambulatory administrators. And then, of course, we need to get our providers on board to make sure that they understand all those pieces and parts. And last but surely not least, I think making sure that both information management and DAR have a seat at the table to help build out that framework would be really key contributors, as well as social work, is another great one I would for sure put on advisement. And then, of course, Patrick M. Magoon for Healthy Communities really to strengthen that community buy-in as well. |
| 1. Patients & Families who will participate in the SBIRT intervention | Definition: Patients and caregivers served by The Hospital between the ages of 10-18.    Inclusion Criteria:   1. Include statements related to engagement strategies (e.g., how patients will become engaged with SBIRT).     Exclusion Criteria:   1. Exclude statements demonstrating (lack of) awareness of the needs and resources of patients served by the The Hospital and whether or not that awareness will influence the implementation or adaptation of SBIRT and code to [Needs & Resources of Those Served by the Organization](http://cfirwiki.net/wiki/index.php?title=Patient_Needs_%26_Resources).     Example Interview Question: How would you suggest that information about SBIRT-A be communicated to patients and caregivers?    Example Response: “Just as in accordance with aligning with we want to do the right thing with the patient, how do we make sure that this is clearly communicated you know, ‘This is just standard protocol. We do this for all our patients. We want to make sure you feel supported.’” |
| 1. **Intervention (i.e., SBIRT) Characteristics** |  |
| 1. Evidence Strength & Quality | Definition: Hospital staff and providers’ perceptions of the quality and validity of evidence supporting that SBIRT will be effective at reducing AOD use in this population.    Inclusion Criteria:   1. Include statements regarding awareness of evidence. 2. Include statements that describe the strength and quality of evidence. 3. Include statements that describe the absence of evidence or a desire for different types of evidence, such as pilot results instead of evidence from the literature, goals foreseeing to be achieved through SBIRT.     Exclusion Criteria:   1. Exclude or double code statements regarding the receipt of evidence as an engagement strategy to [Engaging](http://cfirwiki.net/wiki/index.php?title=Engaging): Key hospital staff. 2. Exclude or double code descriptions of use of results from local or regional pilots to [Trialability](http://cfirwiki.net/wiki/index.php?title=Trialability).     Example Interview Question: What kind of supporting evidence or proof do you think is needed about the effectiveness of SBIRT-A to get staff on board?    Example Response: “I think what you would have to prove is – through these screening questions – a first question out of most people’s mouths is, ‘Has this been done before? What’s the evidence behind it? What’s the evidence behind asking these questions? Are these evidence-based questions or things we just made up based on our own expertise?’ And then just really understanding how this will impact their patient population.” |
| 1. Relative Advantage | Definition: Hospital staffs’ perception of the advantage of implementing SBIRT versus an alternative AOD use intervention.  Inclusion Criteria:   1. Include statements that demonstrate SBIRT is better (or worse) than existing AOD use programs. 2. Statements that compare/contrast SBIRT to other AOD use programs.   Exclusion Criteria:   1. Exclude statements that demonstrate a strong need for SBIRT and/or that the current situation is untenable and code to [Tension for Change](http://cfirwiki.net/wiki/index.php?title=Tension_for_Change).     Example Interview Question: How does SBIRT-A compare to other similar existing substance use services in your setting?    Example Response: “We don’t really have any so at this point it’s just us kind of asking those questions and providing follow-up resources.” |
| 1. Adaptability | Definition: The degree to which SBIRT can be **integrated o**r altered to meet patient needs and clinician needs (e.g., workflow demands and processes). This is the actual content of the tool and intervention.  Inclusion Criteria:   1. Include statements regarding the (in)ability to integrate/alter SBIRT to their context (e.g., complaints about the rigidity of the protocol or discussing the ease of incorporation into the unit workflow/daily clinical procedures). 2. Suggestions for improvement can be captured in this code but should not be included in the rating process, unless the participant feels the change is needed but the program cannot be adapted. However, it may be possible to infer that many suggestions for improvement demonstrate lack of compatibility, see exclusion criteria below.     Exclusion Criteria:   1. Exclude or double code statements that SBIRT did or did not need to be altered to [Compatibility](http://cfirwiki.net/wiki/index.php?title=Compatibility).     Example Interview Question: Based on my description of SBIRT-A, how could it be integrated into your setting? When, where, and how would be a good time to introduce SBIRT-A?    Example Response: “I would probably strongly encourage inpatient as a first place. The rationale behind that is that you can get the buy-in for – as I mentioned before – standardizing the questions on the AST tool.” |
| 1. Trialability | Definition: The ability to pilot SBIRT on a small scale in the organization, and to be able to reverse course (undo implementation) if warranted.    Inclusion Criteria:   1. Include statements related to whether the site piloted SBIRT in the past or has plans to in the future, and comments about whether they believe it is (im)possible to conduct a pilot.     Exclusion Criteria:   1. Exclude or double code descriptions of use of results from local or regional pilots to [Evidence Strength & Quality](http://cfirwiki.net/wiki/index.php?title=Evidence_Strength_%26_Quality).     Example Interview Question: Do you think it would be possible to pilot SBIRT-A before making it available to everyone?    Example Response: “I think piloting it on a consult team would be a nice way to do it. But then I think the thought would be it’s on the consult psych service to do these questions and not the providers which is sometimes what happens when we pilot interventions and then try to push them onto providers.” |
| 1. Complexity | Definition: Perceived complexity of SBIRT, reflected by duration, scope, radicalness, disruptiveness, centrality, and intricacy and number of steps required to implement.    Inclusion Criteria:   1. Code statements regarding the complexity of SBIRT.     Exclusion Criteria:   1. Exclude statements regarding the complexity of implementation and code to the appropriate CFIR code, (e.g., difficulties related to space are coded to Available Resources and difficulties related to engaging participants in a new program are coded to [Engaging](http://cfirwiki.net/wiki/index.php?title=Engaging): hospital staff/providers).     Example Interview Question: Based on my description at the beginning of the interview, how complicated does SBIRT-A seem to implement?    Example Response: “You’re dealing with sensitive information, which always adds a level of complexities, especially with children or various different ages, legal ramifications in the State of Illinois for privacy laws, and data sharing for those pieces.”    "Oftentimes when you’re dealing with screening for standardized questions or sensitive information, there’s gonna be a lot of stakeholders who are gonna try to I'll say derail the progress.” |
| 1. Design Quality & Packaging | Definition: Perception of the SBIRT protocol materials.    Inclusion Criteria:   1. Include statements regarding the quality of SBIRT materials. 2. Include statements discussing accessibility of materials to use SBIRT.   Exclusion Criteria:   1. Exclude statements regarding the presence or absence of materials and code to [Available Resources](http://cfirwiki.net/wiki/index.php?title=Available_Resources). 2. Exclude statements regarding the receipt of materials as an engagement strategy and code to [Engaging](http://cfirwiki.net/wiki/index.php?title=Engaging).     Example Interview Question: What supports such as online resources, marketing materials, or a tool kit would you need to help you implement and use SBIRT-A?    Example Response: “I think kind of just a one sheet hand out for trainees and providers to start with and kind of post everywhere and have with them would be helpful.”  “I think in my experience when there’s giant relearns nobody really retains that information. Or if they’re extensive, too much material, nobody listens to it. So, I think making it more brief, digestible, sure initially giving some of the background but just here’s the information you need to know in scripting of what you need to ask and do.” |
| 1. Cost | Definition: Costs of SBIRT and costs incurred with implementing SBIRT including clinician billing and IT costs.    Inclusion Criteria:   1. Include statements related to the cost of SBIRT and its implementation.     Exclusion Criteria:   1. Exclude statements related to physical space and time, and code to [Available Resources](http://cfirwiki.net/wiki/index.php?title=Available_Resources). In a research study, exclude statements related to costs of conducting the research components (e.g., funding for research staff, participant incentives).     Example Interview Question: What cost should be considered when deciding to implement SBIRT-A?    Example Response: “Areas like social work, nursing are gonna need FTEs to support some of this work and things of that nature.” |
| 1. **Outer Setting** |  |
| 1. Patient Needs & Resources | Definition: The extent to which the needs of those served by The Hospital (e.g., patients & family), as well as barriers and facilitators to meet those needs, are accurately known and prioritized by The Hospital.    Inclusion Criteria:   1. Include statements demonstrating (lack of) awareness of the needs and resources of those served by the The Hospital. 2. Analysts may be able to infer the level of awareness based on statements about: 3. Perceived need for SBIRT based on the needs of those served by the organization and if SBIRT will meet those needs. 4. Barriers and facilitators of those served by The Hospital to participating in SBIRT. 5. Participant feedback on SBIRT (i.e., satisfaction and success in a program). 6. In addition, include statements that capture whether awareness of the needs and resources of those served by The Hospital influenced the implementation or adaptation of SBIRT.     Exclusion Criteria:   1. Exclude statements that demonstrate a strong need for SBIRT and/or that the current situation is untenable and code to [Tension for Change](http://cfirwiki.net/wiki/index.php?title=Tension_for_Change). 2. Exclude statements related to engagement strategies and outcomes, e.g., how patients participating in SBIRT became engaged with SBIRT, and code to [Engaging](http://cfirwiki.net/wiki/index.php?title=Engaging): SBIRT Participants.     Example Interview Question: How well do you think SBIRT-A would meet the needs of patients served at The Hospital?    Example Response: “I think very well. I think that the thought of we can do some of the intervention here versus we just need to refer them out and there’s nowhere to send them at all would be important. Because I think that’s a common concern and struggle right now is identifying that a kid has a need, but we don’t have anything we can do.” |
| 1. Peer Pressure | Definition: Competitive pressure to implement a similar AOD use intervention, typically because most or other key peer or competing children’s hospitals have already implemented.    Inclusion Criteria:   1. Include statements about perceived pressure or motivation from other children’s hospitals in the local geographic area to implement similar AOD use services.     Exclusion Criteria:   1. Exclude statements that describe other programs unrelated to AOD use services.     Example Interview Question: To what extent are other units within The Hospital already implementing SBIRT-A if you know?    Example Response: “I don't think any of the areas that identified implemented SBIRT-A, but making sure that they are thinking through those sensitive questions and how to make sure that we’re incorporating it as part of holistic care.” |
| 1. External Policy & Incentives | Definition: External strategies or principles promoting SBIRT implementation, including policy and regulations (governmental or other central entity within the local area or state), external mandates, recommendations and guidelines, pay-for-performance, collaboratives, and public or benchmark reporting.    Inclusion Criteria:   1. Include descriptions of external performance measures from the healthcare system.     Exclusion Criteria:   1. Exclude statements that describe lack of knowledge regarding this topic.     Example Interview Question: What kind of local, state, or national guidelines do you think may influence our hospital’s decision to implement SBIRT-A?    Example Response: “If this were an item for Joint Commission, it would be done.” |
| 1. **Inner Setting** |  |
| 1. Structural Characteristics | Definition: The social architecture, age, maturity, and size of The Hospital.    Inclusion Criteria:   1. Include statements that discuss structural facilitators/set-backs that may affect the universal/large scale implementation of SBIRT at The Hospital. Example: integrating in to EPIC, fielding during intake, creating workflows.     Exclusion Criteria:   1. Exclude statements about needing change without describing how it affects the implementation of SBIRT.     Example Interview Question: What kinds of infrastructure changes would be needed to accommodate SBIRT-A?    Example Response: “I don't know that there’s changes needed for the screening, but I think it’s something that has to be built into the workflow for the provider or whoever would be doing the intervention.”    “If we’re thinking about that second phase of screening that you described upon admission to inpatient, then we have them there for a certain amount of time and I believe inpatient – the average inpatient stay – is what like three days?” |
| 1. Networks & Communications | Definition: The nature and quality of meetings, and the nature and quality of formal and informal communications within The Hospital.    Inclusion Criteria:   1. Include statements about general networking, communication, and relationships in the organization, such as descriptions of meetings, frequency of meetings, email groups, or other methods of keeping people connected and informed, and statements related to team formation, staff involved, quality, and functioning. 2. Include statements regarding problem solving techniques. 3. Discussion of collaboration between departments 4. Exclusion Criteria: Exclude statements related to implementation leaders' and users' access to knowledge and information regarding using the program, i.e., training on the mechanics of the program and code to [Access to Knowledge & Information](http://cfirwiki.net/wiki/index.php?title=Access_to_Knowledge_%26_Information). 5. Exclude statements related to engagement strategies and outcomes, e.g., how hospital staff became engaged with SBIRT-A and what their role is in implementation, and code to [Engaging](http://cfirwiki.net/wiki/index.php?title=Engaging): Hospital staff 6. Exclude descriptions of outside group memberships and networking done outside The Hospital and code to [Cosmopolitanism](http://cfirwiki.net/wiki/index.php?title=Cosmopolitanism).     Example Interview Question: Are meetings such as staff meetings held regularly?    Example Response: “Yes, they’re monthly. But I know that there’s rarely meetings where everybody is there so, social workers, psychologists, and psychiatrists of all departments, so that stuff. I think if the thought is residents and nurses are implementing this, I don’t think there’s a lot of meetings where all of those people are involved." |
| 1. Culture | Definition: Norms, general beliefs, values, and basic assumptions of people and staff at The Hospital.    Inclusion Criteria:   1. Include description of values, assumptions, and general belief of units/departments. 2. Include statements that discuss reactions to new ideas and the influence of The Hospital culture on the proposed intervention. 3. Inclusion criteria, and potential sub-codes, will depend on the framework or definition used for “culture.” For example, if using the [Competing Values Framework](http://www.implementationscience.com/content/2/1/13/abstract) (CVF), you may include four sub-codes related to the four dimensions of the CVF and code statements regarding one or more of the four dimensions in an organization.     Exclusion Criteria:   1. Exclude statements that describe the implementations fit with The Hospital culture. Code as Compatibility.     Example Interview Question: How would you describe the culture of The Hospital?    Example Response: “I feel like there’s a lot of different cultures within one organization.” |
| 1. Compatibility | Definition: The degree of fit between meaning and values attached to SBIRT by involved individuals such as patients and families as well as staff, how those align with individuals’ own norms, values, and perceived risks and needs, and how SBIRT fits with existing workflows and processes. This is the meaning and value of the tool and fit with individual and organizational values/mission.    Inclusion Criteria:   1. Include statements that demonstrate the level of compatibility SBIRT has with The Hospital values, current work processes/practices, and goals. 2. Include statements that SBIRT did or did not need to be adapted as evidence of compatibility or lack of compatibility.   Exclusion Criteria:   1. Exclude or double code statements regarding the priority of SBIRT based on compatibility with organizational values to [Relative Priority](http://cfirwiki.net/wiki/index.php?title=Relative_Priority), e.g., if an intervention is not prioritized because it is not compatible with organizational values.     Example Interview Question: How well does SBIRT-A fit with the mission and values at The Hospital?    Example Response: “It fits. Yeah, that’s not an issue. We’re screening for social determinants of health, so no problem here.”    “I think it fits right in there. I think identifying that this is an issue amongst youth and finding ways to identify the impact or the numbers that are impacted by it and then also being able to offer resources and services based on that.” |
| 1. Relative Priority | Definition: Individuals’ shared perception of the importance or priority of implementing SIBRT within The Hospital compared to other high-priority initiatives.    Inclusion Criteria:   1. Include statements that reflect the relative priority of SBIRT and possibly integrating SBIRT into other ongoing initiatives. e.g., statements related to change fatigue in the organization due to implementation of many other programs, other programs/initiatives that may be a higher/lower priority than SBIRT.     Exclusion Criteria:   1. Exclude or double code statements regarding the priority of SBIRT based on compatibility with organizational values to [Compatibility](http://cfirwiki.net/wiki/index.php?title=Compatibility), e.g., if an intervention is not prioritized because it is not compatible with The Hospital’s values.     Example Interview Question: What kinds of high-priority initiatives are already happening in your setting and what is your impression of the priority of getting SBIRT-A implemented relative to other initiatives that are happening currently?    Example Response: “I think it could align nicely with the social influences of health – the work happening in that space.” |
| 1. Organizational Incentives & Rewards | Definition: Extrinsic incentives such as goal-sharing, awards, performance reviews, promotions, and raises in salary, and less tangible incentives such as increased stature or respect.    Inclusion Criteria:   1. Include statements related to whether organizational incentive systems are in place to foster (or hinder) implementation, e.g., rewards or disincentives for staff engaging in SBIRT.     Exclusion Criteria:   1. Exclude statements unrelated to organizational incentive systems present.     Example Interview Question: What kinds of incentives are there to help ensure that the implementation of SBIRT-A is successful? What kind of incentives do you think are needed?    Example Response: “I mean honestly the way to make people do things on the floor is to make it like they can’t close out a note unless they complete it or something like that.” |
| 1. Learning Climate | Definition: A climate in which:   1. Leaders express their own fallibility and need for team members’ assistance and input. 2. Team members feel that they are essential, valued, and knowledgeable partners in the change process. 3. Individuals feel psychologically safe to try new methods. 4. There is sufficient time and space for reflective thinking and evaluation.     Inclusion Criteria:   1. Include statements that support (or refute) the degree to which key components of The Hospital exhibits a “learning climate.”     Exclusion Criteria:   1. Exclude statements that do not describe components of The Hospital’s learning climate.     Example Interview Question: Can you describe a recent quality improvement initiative or an implementation of a new program?    Example Response: “I think we had so many great people here at The Hospital who’ve already been implementing social influences of health across many different areas.” |
| 1. Available Resources | Definition: The level of resources The Hospital dedicated for implementation of SBIRT and on-going operations including physical space and time.    Inclusion Criteria:   1. Include statements related to the presence or absence of resources specific to SBIRT being implemented     Exclusion Criteria:   1. Exclude statements related to training and education and code to [Access to Knowledge & Information](http://cfirwiki.net/wiki/index.php?title=Access_to_Knowledge_%26_Information). 2. Exclude statements related to the quality of materials and code to [Design Quality & Packaging](http://cfirwiki.net/wiki/index.php?title=Design_Quality_%26_Packaging). 3. In a research study, exclude statements related to resources needed for conducting the research components (e.g., time to complete research tasks, such as IRB applications, consenting patients).     Example Interview Question: Do you expect to have sufficient resources to implement and administer SBIRT-A in your department with all that you have going on?    Example Response: “I think the initial nursing assessment could be the way to do it. When someone is initially admitted, the nurses typically do …especially for psychiatry patients, they would do a behavioral support assessment, and in that, they ask about barriers.” |
| 1. **Additional Codes** |  |
| 1. Tension for Change | Definition: The degree to which stakeholders perceive the current situation as intolerable or needing change.    Inclusion Criteria: Include statements that (do not) demonstrate a strong need for the innovation and/or that the current situation is untenable, e.g., statements that the innovation is necessary or that the innovation is redundant with other programs. Note: If a participant states that the innovation is redundant with a preferred existing program, (double) code lack of [Relative Advantage](http://cfirwiki.net/wiki/index.php?title=Relative_Advantage), see exclusion criteria below.    Exclusion Criteria: Exclude statements regarding specific needs of individuals that demonstrate a need for the innovation, but do not necessarily represent a strong need or an untenable status quo, and code to [Needs and Resources of Those Served by the Organization.](http://cfirwiki.net/wiki/index.php?title=Patient_Needs_%26_Resources)  Exclude statements that demonstrate the innovation is better (or worse) than existing programs and code to [Relative Advantage](http://cfirwiki.net/wiki/index.php?title=Relative_Advantage). |
| 1. Access to knowledge and Information | Definition: Ease of access to digestible information and knowledge about the innovation and how to incorporate it into work tasks.    Inclusion Criteria: Include statements related to implementation leaders' and users' access to knowledge and information regarding use of the program, i.e., training on the mechanics of the program or continuing education.    Exclusion Criteria: Exclude statements related to engagement strategies and outcomes, e.g., how key stakeholders became engaged with the innovation and what their role is in implementation, and code to [Engaging](http://cfirwiki.net/wiki/index.php?title=Engaging): Key Stakeholders.    Exclude statements about general networking, communication, and relationships in the organization, such as descriptions of meetings, email groups, or other methods of keeping people connected and informed, and statements related to team formation, quality, and functioning, and code to [Networks & Communications](http://cfirwiki.net/wiki/index.php?title=Networks_%26_Communications). |
| 1. Engaging | Definition: Attracting and involving appropriate individuals in the implementation and use of the innovation through a combined strategy of social marketing, education, role modeling, training, and other similar activities.    Inclusion Criteria: Include statements related to engagement strategies and outcomes, i.e., if and how staff and innovation participants became engaged with the innovation and what their role is in implementation. Note: Although both strategies and outcomes are coded here, the outcome of engagement efforts determines the rating, i.e., if there are repeated attempts to engage staff that are unsuccessful, or if a role is vacant, the construct receives a negative rating. In addition, you may also want to code the "quality" of staff - their capabilities, motivation, and skills, i.e., how good they are at their job, and this data affects the rating as well.    Exclusion Criteria: Exclude statements related to specific sub constructs, e.g., [Champions](http://cfirwiki.net/wiki/index.php?title=Champions) or [Opinion Leaders](http://cfirwiki.net/wiki/index.php?title=Opinion_Leaders).    Exclude or double code statements related to who participated in the decision process to implement the innovation to [Innovation Source](http://cfirwiki.net/wiki/index.php?title=Intervention_Source), as an indicator of internal or external innovation source. |
| 1. Cosmopolitanism | Definition: The degree to which an organization is networked with other external organizations. External collaboration.    Inclusion Criteria: Include descriptions of outside group memberships and networking done outside the organization.    Exclusion Criteria: Exclude statements about general networking, communication, and relationships in the organization, such as descriptions of meetings, email groups, or other methods of keeping people connected and informed, and statements related to team formation, quality, and functioning, and code to [Networks & Communications](http://cfirwiki.net/wiki/index.php?title=Networks_%26_Communications). |

Codes Created for this SBIRT-Inpatient project

| 1. Past success | Definition:  Past success (descriptions of activities, structures, communication campaigns, etc. used to roll out prior initiatives that were successful - and their challenges)    Inclusion Criteria:  -Current practices that work well for communication/outreach/engagement/tracking, building trust etc.  -past successes from prior interventions/policy implementations/efforts etc.  -Building of trust…    Exclusion Criteria: Ideas for successful implementation that aren’t based on something that has worked in the past – code that as Ideas for success?  Example Interview Question: Can you describe a recent quality improvement initiative or an implementation of a new program?  Example Response: Well, there was all the work around the BRT that was happening and that really involved Epic build, reporting work tension radar, real-time reporting in Epic hyperspace that our team helped with. We build power VI reports for them and a lot of different groups and teams were involved in implementing the BRT process and the center for quality and safety and Julia Moriarty. I think it was really helpful to have that partnership with the center for quality and safety in the initiative and that pulled in people like Agata and Jeremy as well as Julia to assist. |
| --- | --- |
| 1. Ideas for success | Definition: discussion of person’s thoughts or ideas for ways to make SBIRT successful.    Inclusion Criteria:  Discussion of facilitators for change  Strategies for getting providers to change behavior  Strategies for getting buy-in    Exclusion Criteria: Can’t talk about a past success    Example Interview Question: N/A  Example Response: What I mean by that is that you’re not searching through their chart. You’re not looking all over the place. It’s easy. If it’s not easy, people just don’t do it and I know that’s very cliché, but it’s something that rings true all the time for us. We have to make it easy to do the right things for not only the people who are screening – so community-based organizations, us as healthcare organizations – but really making it easy to take those next steps and everyone’s very clear on the paths to take them. |
| G. SBIRT Data Use | Definition:  what are the data used for? Discussion of practices that need to be in place? Use for patients? Use for providers? Sharing data? Not punitive – having structures and referrals in place to do something if it is indicated. USE the data.    Inclusion Criteria:    Exclusion Criteria:  Example Interview Question: N/A  Example Response: So, I think really key for success what I heard here was making sure that data is standardized across both us as healthcare organizations and community organizations. And once you do that too, that lends itself to interoperability and data sharing and things of that nature, which is also a huge plus when you’re looking at the severe or this very vulnerable population I should say. Also considering that there’d be standard documentation. So, one of the barriers that oftentimes that I see in my work is that this information is not captured discretely.  Or  I think streamlining that to have some specific referral source after the fact is super useful as well. Again, I think it’s just about trying to make this something that they can utilize as an additional tool as opposed to trying to make it more of a punitive screening, which this sounds like it’s going in the direction of trying to be just a helpful thing that they can have if they need it or they’re interested in it. |

**General Coding Rules:**

When two codes are in question for a passage, consider the primary meaning of the passage to assign code; consider what the participant is truly saying. Analysts may wish to err on the side of inclusion or double coding.

**General Rating Rules:**

| **Ratings** | | | | | | |
| --- | --- | --- | --- | --- | --- | --- |
| M | -2 | -1 | 0 | X | +1 | +2 |

In general, ratings are determined based on two factors: 1) valence and 2) strength.

**Valence: positive or negative influence on implementation**

*Rating component: X, 0, +, -*

The valence component of a rating is determined by the influence the coded data has on the implementation process, i.e., contextual factors that facilitate or hinder implementation. Due to limited data, analysts may have to infer the influence on implementation based on simple presence or absence of a construct. For example, if a participant states that SBIRT-A has advantages over existing programs, but does not state how this has influenced implementation, the analyst can infer that the presence of relative advantage facilitated implementation. However, whenever the data allows, the analysts should apply ratings based on the influence the construct has on implementation, not the presence or absence of a construct; presence or absence of a positive construct (e.g. relative advantage) does not always constitute a matching positive or negative influence on implementation.

In the event that comments are mixed, i.e., some comments are negative and some comments are positive, try to tip the rating to a weak positive or weak negative, based on the aggregate of the comments. However, if you feel the comments are equally positive and negative, apply a mixed (X) rating. Some users of the CFIR have denoted level of agreement among participants in their rating by adding a * to the rating if comments were mixed. For example, if the aggregate of mixed comments was positive, the rating was +1*. Some users feel it’s important to record discord among participants because it indicates a negative influence on implementation.

In the event that the comments are neutral, i.e., comments are related to a construct but have no bearing on the implementation, apply the neutral (0) rating.

**Strength: weak or strong influence on implementation**

*Rating component: 1, 2*

The strength component of a rating is determined by a number of factors, including: level of agreement among participants, strength of language, and use of concrete examples. However, sometimes analysts may choose to apply relative ratings, versus absolute ratings, in order to differentiate between organization in the study.
